# Supplementary material for: Survey and Molecular Characterization of Sarcocystidae protozoa in Wild Cricetid Rodents from Central and Southern Chile
Source: MDPI journal article supplement (doi:10.3390/ani13132100), 2023-06-24
Supplement: s1 [file s1]

Table S2. Overview table of corrected pairwise genetic distance between species representing each genus of the Toxoplasmatinae subfamily (clade A, see Figure 1A), based on the alignment of 718 base pairs (bp) of 22 sequences of the 18S rRNA gene.

|                                 | <i>Hyaloklossia</i><br>sp. | Sarcocystidae<br>sp. <sup>a</sup> | Sarcocystidae<br>sp. <sup>b</sup> | Apicomplexa<br>sp. <sup>b</sup> | <i>Cystoisospora</i><br>sp. | <i>Besnoitia</i><br>sp. | <i>Nephroisospora</i><br><i>eptesici</i> | Toxoplasmatinae gen. sp.<br>P99 | <i>Neospora</i><br><i>caninum</i> | <i>Hammondia</i><br>sp. | <i>Hammondia</i><br><i>hammondi</i> | <i>Toxoplasma</i><br><i>gondii</i> |
|---------------------------------|----------------------------|-----------------------------------|-----------------------------------|---------------------------------|-----------------------------|-------------------------|------------------------------------------|---------------------------------|-----------------------------------|-------------------------|-------------------------------------|------------------------------------|
| <i>Hyaloklossia</i> sp.         | 0.0038                     |                                   |                                   |                                 |                             |                         |                                          |                                 |                                   |                         |                                     |                                    |
| Sarcocystidae sp. <sup>a</sup>  | 0.0537                     | N/A                               |                                   |                                 |                             |                         |                                          |                                 |                                   |                         |                                     |                                    |
| Sarcocystidae sp. <sup>b</sup>  | 0.0371                     | 0.0479                            | N/A                               |                                 |                             |                         |                                          |                                 |                                   |                         |                                     |                                    |
| Apicomplexa sp. <sup>b</sup>    | 0.0866                     | 0.1588                            | 0.0609                            | N/A                             |                             |                         |                                          |                                 |                                   |                         |                                     |                                    |
| <i>Cystoisospora</i> sp.        | 0.0354                     | 0.0522                            | 0.0473                            | 0.1360                          | 0.0112                      |                         |                                          |                                 |                                   |                         |                                     |                                    |
| <i>Besnoitia</i> sp.            | 0.0366                     | 0.0641                            | 0.0497                            | 0.1330                          | 0.0306                      | 0.0126                  |                                          |                                 |                                   |                         |                                     |                                    |
| <i>Nephroisospora eptesici</i>  | 0.0488                     | 0.0699                            | 0.0582                            | 0.1451                          | 0.0359                      | 0.0349                  | N/A                                      |                                 |                                   |                         |                                     |                                    |
| Toxoplasmatinae gen. sp.<br>P99 | 0.0456                     | 0.0604                            | 0.0359                            | 0.1389                          | 0.0320                      | 0.0294                  | 0.0371                                   | N/A                             |                                   |                         |                                     |                                    |
| <i>Neospora caninum</i>         | 0.0399                     | 0.0639                            | 0.0532                            | 0.1388                          | 0.0300                      | 0.0206                  | 0.0293                                   | 0.0221                          | N/A                               |                         |                                     |                                    |
| <i>Hammondia</i> sp.            | 0.0400                     | 0.0641                            | 0.0455                            | 0.1312                          | 0.0301                      | 0.0207                  | 0.0293                                   | 0.0190                          | 0.0024                            | 0.000001                |                                     |                                    |
| <i>Hammondia hammondi</i>       | 0.0400                     | 0.0681                            | 0.0481                            | 0.1366                          | 0.0301                      | 0.0207                  | 0.0264                                   | 0.0221                          | 0.0024                            | 0.0024                  | N/A                                 |                                    |
| <i>Toxoplasma gondii</i>        | 0.0416                     | 0.0701                            | 0.0507                            | 0.1377                          | 0.0301                      | 0.0207                  | 0.0250                                   | 0.0236                          | 0.0036                            | 0.0036                  | 0.0012                              | N/A                                |

<sup>a</sup> Sarcocystidae sp. from American opossums.

<sup>b</sup> Sarcocystidae sp. from Australian opossums.
